# Supplementary material for: Proteomic discovery of substrates of the cardiovascular protease ADAMTS7
Source: PubMed Central journal article supplement (PMC6527163; doi:10.1074/jbc.ra119.007492), 2019-03-29
Supplement: supp_RA119.007492_143046_2_supp_307582_pp2sg8.pdf [file supp_RA119.007492_143046_2_supp_307582_pp2sg8.pdf]

Supporting Information for:

## **Proteomic substrate discovery of the cardiovascular protease ADAMTS7**

A. Colige<sup>a</sup>, C. Monseur<sup>a</sup>, J.T.B. Crawley<sup>b</sup>, S. Santamaria<sup>b</sup>, R. de Groot<sup>b</sup>

<sup>a</sup> Laboratory of Connective Tissue Biology  
GIGA, University of Liège  
Sart-Tilman  
4000 Liège  
Belgium

<sup>b</sup> Centre for Haematology  
Imperial College London  
W12 0NN London  
United Kingdom

This PDF file includes:

**Table S1:** Candidate substrates of ADAMTS7 identified by TAILS

**Table S2:** ADAMTS7 peptides identified by TAILS suggesting autolysis

**Table S3:** LTBP4 scissile bonds cleaved by ADAMTS7

### **Corresponding Author**

Dr Rens de Groot  
Imperial College London  
Centre for Haematology  
5th Floor Commonwealth Building  
Hammersmith Hospital Campus  
Du Cane Road, W12 0NN London  
United Kingdom  
T: ++44 (0) 20 83 83 22 98  
E: R.deGroot@imperial.ac.uk

**Table S1. Candidate substrates of ADAMTS7 identified by TAILS**

Secreted and transmembrane proteins containing neo-N-termini that were enriched in the presence of active recombinant ADAMTS7 vs inactive ADAMTS7(E389Q). Listed is 1) the ID of the protein in the UniProt database, 2) the full name of the protein, 3) whether the protein is a secreted (S) or a transmembrane (TM) protein, 4) the P1 residue preceding the identified peptide, 5) the amino acid sequence of the identified peptide, 6) the intensity ratio of iTRAQ labels originating from the protease (P) and control (C) condition and 7) the location of the new N-terminus in the structure of the identified protein. ADAMTS7 peptides are listed separately in Table S2.

| UniProt ID | Protein name                                                     | TM/S | P1    | Peptide           | P:C | Location new N-terminus                                               |
|------------|------------------------------------------------------------------|------|-------|-------------------|-----|-----------------------------------------------------------------------|
| O95450     | A disintegrin and metalloproteinase with thrombospondin motifs 2 | S    | A42   | ADPPGGPLGHGAER    | 1.9 | Prodomain                                                             |
| O00468     | Aggrin                                                           | S    | K1863 | SAGDVRTLAFDGR     | 1.6 | Loop connecting EGF-like 4 and Laminin G-like 3 domains               |
| P22004     | Bone morphogenetic protein 6                                     | S    | A35   | AAAAGGQLLGDGGSPGR | 2.4 | Propeptide                                                            |
| Q9NYQ6     | Cadherin EGF LAG seven-pass G-type receptor 1                    | TM   | R62   | ELLDVGR           | 1.6 | Unknown structure                                                     |
| O75976     | Carboxypeptidase D                                               | S    | G227  | EPPALDEVPEVR      | 3.4 | Loop in Peptidase M14 domain                                          |
| P16870     | Carboxypeptidase E                                               | S    | R42   | LQQEDGISFEYHR     | 1.7 | N-terminus preceding Peptidase M14 domain                             |
| P07858     | Cathepsin B                                                      | S    | K79   | LPASFDAR          | 1.7 | Loop connecting propeptide with cysteine peptidase domain             |
| P10909     | Clusterin                                                        | S    | R325  | ELDESLQVAER       | 1.8 | Clusterin domain                                                      |
| P10909     | Clusterin                                                        | S    | A266  | FQHPPTEFIR        | 1.8 | Clusterin domain                                                      |
| P10909     | Clusterin                                                        | S    | P265  | AFQHPTEFIR        | 1.5 | Clusterin domain                                                      |
| P02452     | Collagen alpha-1(I) chain                                        | S    | A1218 | DDANVVR           | 1.6 | Loop preceding C-terminal prodomain. (BMP1 cleavage site)             |
| P02452     | Collagen alpha-1(I) chain                                        | S    | G174  | ISVPGPMGPGSPGR    | 1.5 | Non-helical region following the n-terminal propeptide                |
| P02452     | Collagen alpha-1(I) chain                                        | S    | K781  | GESGSPGAGPTGAR    | 1.6 | Triple-helical region                                                 |
| P02452     | Collagen alpha-1(I) chain                                        | S    | R1217 | ADDANVVR          | 1.5 | Loop preceding C-terminal prodomain                                   |
| P02461     | Collagen alpha-1(III) chain                                      | S    | N1251 | GQIESLISPDGSR     | 1.6 | C-terminal propeptide (Stalk region)                                  |
| P20908     | Collagen alpha-1(V) chain                                        | S    | P435  | ANQDTIYEGIGGPR    | 1.9 | Nonhelical region                                                     |
| P39060     | Collagen alpha-1(XVIII) chain                                    | S    | A1533 | DDILASPPR         | 2.1 | NC1 hinge region. Releases endostatin.                                |
| P08123     | Collagen alpha-2(I) chain                                        | S    | P983  | SGPVGPAGAVGPR     | 1.6 | Triple helical region                                                 |
| P08572     | Collagen alpha-2(IV) chain                                       | S    | G1353 | FMGNTGPTGAVGDR    | 1.9 | Triple-helical region                                                 |
| P05997     | Collagen alpha-2(V) chain                                        | S    | G213  | SVGPVGPR          | 2.7 | Triple-helical region                                                 |
| P12111     | Collagen alpha-3(VI) chain                                       | S    | G2240 | LIGEQQISGPR       | 2.2 | Collagen-like region                                                  |
| P01034     | Cystatin-C                                                       | S    | R34   | LVGGPMDASVEEEGVV  | 3.2 | N-terminal region. Proteolysis may affect inhibitory function.        |
| Q9NT22     | EMILIN-3                                                         | S    | V224  | GFGVIPEGLVGPGR    | 2.0 | Unknown structure                                                     |
| P54756     | Ephrin type-A receptor 5                                         | TM   | A55   | SPSNEVNLLDSR      | 1.7 | Prior to Eph LBD domain                                               |
| Q8IWU6     | Extracellular sulfatase Sulf-1                                   | S    | N558  | LEEEEEELQVLQPR    | 4.8 | PFAM predicted domain DUF3740                                         |
| Q8IWU6     | Extracellular sulfatase Sulf-1                                   | S    | Y555  | DINLEEEEEELQVLQPR | 2.4 | PFAM predicted domain DUF3740                                         |
| Q8IWU5     | Extracellular sulfatase Sulf-2                                   | S    | Y549  | HVGLGDAAQPR       | 2.2 | PFAM predicted domain DUF3740                                         |
| P35556     | Fibrillin-2                                                      | S    | N781  | GICENLR           | 1.6 | EGF-like 11 domain                                                    |
| P35556     | Fibrillin-2                                                      | S    | R48   | SATAGSEGGFLAPEYR  | 2.5 | Propeptide                                                            |
| P02751     | Fibronectin                                                      | S    | T279  | SSGSGPFTDVR       | 1.7 | Loop connecting Fibronectin type-I 5 and Fibronectin type-I 6 domains |
| P02751     | Fibronectin                                                      | S    | S281  | GSGPFTDVR         | 4.8 | Loop connecting Fibronectin type-I 5 and Fibronectin type-I 6 domains |
| Q86VR8     | Four-jointed box protein 1                                       | S    | L84   | TLAAGADGPPR       | 1.5 | Unknown structure                                                     |
| P22466     | Galanin peptides                                                 | S    | L109  | DLPAAASSEDIER     | 2.7 | Galanin message associated peptide (GMAP)                             |
| Q08380     | Galectin-3-binding protein                                       | S    | K441  | YSSDYFQAPSDYR     | 2.2 | Unknown structure                                                     |

|        |                                                                          |    |      |                       |     |                                                         |
|--------|--------------------------------------------------------------------------|----|------|-----------------------|-----|---------------------------------------------------------|
| Q08380 | Galectin-3-binding protein                                               | S  | R128 | STHTLDLSR             | 1.8 | Loop connecting SRCR and BTB domains                    |
| Q08380 | Galectin-3-binding protein                                               | S  | Y446 | FQAPSDYR              | 2.7 | Unknown structure                                       |
| P28799 | Granulins                                                                | S  | A201 | LSSVMCPDAR            | 1.5 | Loop connecting granulin F and Granulin B               |
| P28799 | Granulins                                                                | S  | S203 | SSVMCPDAR             | 1.5 | Loop connecting granulin F and Granulin B               |
| P28799 | Granulins                                                                | S  | S204 | SVMCPDAR              | 1.7 | Loop connecting granulin F and Granulin B               |
| P28799 | Granulins                                                                | S  | S205 | VMCPDAR               | 1.7 | Loop connecting granulin F and Granulin B               |
| P30443 | HLA class I histocompatibility antigen, A-1 alpha chain                  | TM | V49  | GYVDDTQFVR            | 1.8 | Alpha-1 region                                          |
| P08476 | Inhibin beta A chain                                                     | S  | N98  | GYVEIEDDIGR           | 1.7 | Propeptide                                              |
| P05019 | Insulin-like growth factor I                                             | S  | A48  | GPETLCGAELVDALQFVCGDR | >>1 | Loop connecting N-terminal propeptide with IGF I        |
| Q08431 | Lactadherin                                                              | S  | N34  | GGLCEEISQEVK          | 1.6 | EGF-like domain                                         |
| P25391 | Laminin subunit alpha-1                                                  | S  | C873 | LGNTDGAHCER           | 8.1 | Laminin EGF-like 8                                      |
| Q14766 | Latent-transforming growth factor beta-binding protein 1                 | S  | K318 | GISGEQSTEGSFPLR       | 2.6 | Prior to 4-Cys domain. Present in long form only.       |
| Q9NS15 | <a href="#">Latent-transforming growth factor beta-binding protein 3</a> | S  | E220 | VQAPPPVVNVR           | 1.9 | Loop connecting EGF-like domain and hybrid domain       |
| Q8N2S1 | <a href="#">Latent-transforming growth factor beta-binding protein 4</a> | S  | E229 | ASVVVHQVER            | 2.1 | Loop connecting EGF-like domain and hybrid domain       |
| Q68D85 | Natural cytotoxicity triggering receptor 3 ligand 1                      | TM | P110 | GIQLEEAGEYR           | 1.8 | Ig-like V-type domain                                   |
| O95502 | Neuronal pentraxin receptor                                              | TM | C21  | IIASVPLAASPAR         | 2.2 | Loop connecting Signal-anchor with Extracellular region |
| P14543 | Nidogen-1                                                                | S  | N233 | GAYNIFANDR            | 1.6 | NIDO (G1) domain                                        |
| P07602 | Prosaposin                                                               | S  | N194 | GDVCQDCIQMVTDIQTAVR   | 1.9 | Loop connecting propeptide with Saposin B-type 2 domain |
| O15354 | Prosaposin receptor GPR37                                                | TM | R73  | EEQGAAFLAGPSWDLPAAPGR | 1.8 | Extracellular region 1                                  |
| O75629 | Protein CREG1                                                            | S  | R45  | LPPLPPR               | 1.9 | Loop preceding $\beta$ -barrel                          |
| Q92520 | Protein FAM3C                                                            | S  | R41  | SALDTAAR              | 1.6 | Known maturation site removing N-terminus               |
| Q04900 | Sialomucin core protein 24                                               | TM | T54  | TPAPETCEGR            | 1.7 | Extracellular region                                    |
| O00391 | Sulfhydryl oxidase 1                                                     | S  | R645 | DTGAALLAESR           | 1.5 | Unknown structure                                       |
| Q6ZMP0 | Thrombospondin type-1 domain-containing protein 4 (ADAMTSL6)             | S  | R98  | AFADHVVS AVR          | 2.1 | 200 amino acid long insert in TSP type-1 1 domain.      |

**Table S2. ADAMTS7 peptides identified by TAILS suggesting autolysis**

Neo-N-termini in ADAMTS7 itself that were enriched in the presence of active ADAMTS7 vs inactive ADAMTS7(E389Q) suggest autolysis. Listed are 1) the domain in which the new N-terminus is located 2) the P1 residue preceding the identified peptide sequence 3) the sequence of the identified peptide 4) the intensity ratio of iTRAQ labels originating from the active protease (P) and control (C) condition.

| Domain        | P1   | Peptide               | P:C  |
|---------------|------|-----------------------|------|
| prodomain     | R40  | AALDIVHPVR            | 4.8  |
| prodomain     | R76  | DAPAFYELQ             | >>1  |
| prodomain     | R76  | DAPAFYEL              | 4.8  |
| prodomain     | R76  | DAPAFYELQYR           | 3.4  |
| prodomain     | P79  | AFYELQYR              | 2.6  |
| prodomain     | T96  | ANQHLLAPGFVSETR       | 3.2  |
| prodomain     | N98  | QHLLAPGFVSETR         | 4.4  |
| prodomain     | Q99  | HLLAPGFVSETR          | 7.8  |
| prodomain     | L101 | LAPGFVSETR            | 4.0  |
| prodomain     | Q194 | RGDSSAPSTCGVQVYPELESR | 2.5  |
| prodomain     | R195 | GDSSAPSTCGVQVYPELESR  | 6.2  |
| prodomain     | P201 | STCGVQVYPELESR        | 22.6 |
| prodomain     | C204 | GVQVYPELESR           | 4.8  |
| prodomain     | C204 | GVQVYPELESRR          | 3.0  |
| prodomain     | G205 | VQVYPELESR            | 3.7  |
| prodomain     | Q207 | VYPELESR              | 5.8  |
| MP            | G328 | GDAHPLHHDTAILLTR      | 2.2  |
| MP            | R370 | SCSINEDTGLPLAF        | 3.6  |
| Dis           | H504 | SKLDAAVDGTR           | 5.4  |
| Dis           | K506 | LDAAVDGTR             | 29.4 |
| cysteine-rich | N637 | EYFAEKLR              | 4.3  |
| cysteine-rich | D646 | AVVDGTPCYQVR          | 3.1  |
| cysteine rich | A647 | VVDGTPCYQVR           | 55.2 |
| cysteine-rich | D650 | GTPCYQVR              | 3.6  |
| cysteine-rich | G673 | CDFEIDSGAMEDR         | 6.0  |
| cysteine-rich | G673 | CDFEIDSGAMEDR         | 3.0  |

| Domain       | P1          | Peptide            | P:C         |
|--------------|-------------|--------------------|-------------|
| spacer       | E706        | AEGLGYVDVGLIPAGAR  | 3.3         |
| spacer       | E708        | GLGYVDVGLIPAGAR    | 4.3         |
| spacer       | G709        | LGYVDVGLIPAGAR     | 10.3        |
| spacer       | G711        | YVDVGLIPAGAR       | 4.8         |
| spacer       | Y712        | VDVGLIPAGAR        | 30.0        |
| spacer       | V713        | DVGLIPAGAR         | 3.4         |
| spacer       | <b>E729</b> | <b>VAEAAFLALR</b>  | <b>92.2</b> |
| spacer       | V730        | AEAANFLALR         | 2.7         |
| spacer       | A731        | EAANFLALR          | 3.5         |
| spacer       | <b>E732</b> | <b>AANFLALR</b>    | <b>39.8</b> |
| spacer       | N758        | GDYQVAGTTFTYAR     | 5.7         |
| spacer       | E797        | SNPGVHYEYTIHR      | 2.2         |
| TSP type-1 4 | C977        | DEAQQPASEVTCSLPLCR | >>1         |
| TSP type-1 4 | P983        | ASEVTCSLPLCR       | 18.2        |
| mucin-like   | N1194       | DFPVGKDSQSQLPPPWR  | 4.3         |
| mucin-like   | K1357       | GQPESLSPEVPLSSR    | 3.7         |
| mucin-like   | L1398       | AEAGPPADPLVVR      | 2.2         |
| mucin-like   | A1399       | EAGPPADPLVVR       | 4.2         |

**Table S3. LTBP4 scissile bonds cleaved by ADAMTS7.** Following LTBP4S-A incubation with ADAMTS7-T8 in the presence (control) or absence of a zinc-chelating small molecule inhibitor, samples were labelled with amine-reactive mass tags (TMT), which labels new N-termini generated by ADAMTS7. After subsequent incomplete digest with Trypsin, Chymotrypsin, and Glu-C, samples were analyzed by LC-MS/MS. Listed are the peptides labelled with TMT at the N-terminus that were found to be abundant in the active protease condition (no inhibitor) but completely absent in the control condition (with inhibitor). The P1 residue preceding the identified peptide is listed with the numbering of LTBP4S (UniProt ID: Q8N2S1-2). Note that using this numbering the P1 residue identified in the original TAILS experiment (Table S1) is E162.

| P1   | Peptide                            |
|------|------------------------------------|
| G73  | AAPGGPGF                           |
| G119 | ARPPAPAVPGLTR                      |
| P138 | LANHRDDEHGVAS                      |
| P138 | LANHRDDEHGVASM/SVHVEHPQEASVVVHQVER |
| S164 | VVVHQVER                           |
| A184 | VARAEAAARAE                        |
| R187 | AEAAAR                             |
| R187 | AEAAARAEAAAP                       |
| R193 | AEAAAPYT                           |
| R193 | AEAAAPYTV                          |
| E195 | AAAPYTVLAQ                         |
| E195 | AAAPYTVLAQSAPREDG                  |
| E195 | AAAPYTVLAQSAPREDGYSD               |
| A196 | AAPYTV                             |
| A196 | AAPYTVLAQSAPR                      |
| A196 | AAPYTVLAQSAPREDG                   |
| A197 | APYTVLAQSAPR                       |
| P199 | YTVLAQSAPR                         |
| T201 | VLAQSAPR                           |
